# Supplementary material
Source: MDPI journal article supplement (https://www.mdpi.com/2227-9717/9/8/1455)
Supplement: s1 [file s1]

## Total Polyphenols Content

### Reagent:

Na<sub>2</sub>CO<sub>3</sub>, p.a. (PENTA s.r.o., Brno, Czech Republic)

Folin-Ciocalteu (FC), p.a. (PENTA s.r.o., Brno, Czech Republic)

Gallic acid 100%, p.a. (PENTA s.r.o., Brno, Czech Republic)

### Protocol:

- 1) Weight of 0.1 g of the sample;
- 2) Add 10 ml of distilled water, homogenize in vortex 2000 rpm MS2 Minishaker (IKA, Staufen, Germany);
- 3) 10 minutes shaking at 150 rpm, Li-3 (Nedform s.r.o., Valašské Meziříčí, Czech Republic);
- 4) Filtration (Whatman grade 1);
- 5) Add 1 ml of the sample extract, 5 ml of FC (10% v/v) and 4 ml of Na<sub>2</sub>CO<sub>3</sub> (7.5% w/v) in 25 mL volumetric flask;
- 6) The solution with 1.0 mL of water instead of the sample was used as the blank;
- 7) 30 minutes incubation in dark;
- 8) Fill to 25mL by distilled water;
- 9) Measure the sample absorbance at 765 nm against the blank (CE7210 Diet-Quest, Cambridge, England).

### TPC standard solution:

The calibration curve is prepared according to the following scheme.

| <b>c mmol/l</b> | <b>Gallic acid 0.5 mg/mL<br/>(mL)</b> | <b>Distilled water<br/>(mL)</b> |
|-----------------|---------------------------------------|---------------------------------|
| <b>0</b>        | 0                                     | 10                              |
| <b>0.0125</b>   | 0.25                                  | 9.75                            |
| <b>0.025</b>    | 0.5                                   | 9.5                             |
| <b>0.05</b>     | 1                                     | 9                               |
| <b>0.1</b>      | 2                                     | 8                               |
| <b>0.2</b>      | 4                                     | 6                               |
| <b>0.5</b>      | 10                                    | 0                               |
